# Supplementary material for: COVID-19, tuberculosis and poverty: preventing a perfect storm
Source: PubMed Central journal article supplement — Eur Respir J. 2020 Jul 9;56(1):2001348. doi: 10.1183/13993003.01348-2020 (PMC7243392; doi:10.1183/13993003.01348-2020), 2020-07-09
Supplement: ERJ-01348-2020.Shareable.pdf [file ERJ-01348-2020.Shareable.pdf]

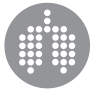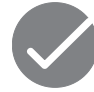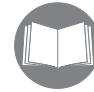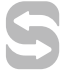

SHAREABLE PDF

# COVID-19, tuberculosis and poverty: preventing a perfect storm

Matthew J. Saunders<sup>1,2,3</sup> and Carlton A. Evans<sup>1,2,3</sup>

**Affiliations:** <sup>1</sup>Dept of Infectious Disease, Imperial College London, London, UK. <sup>2</sup>Innovation For Health And Development (IFHAD), Laboratory of Research and Development, Universidad Peruana Cayetano Heredia, Lima, Peru. <sup>3</sup>Innovación Por la Salud Y Desarrollo (IPSYD), Asociación Benéfica PRISMA, Lima, Perú.

**Correspondence:** Matthew J. Saunders, Clinical Research Fellow, Dept of Infectious Disease, Imperial College London, Hammersmith Hospital Campus, Commonwealth Building level 8, 150 Du Cane Road, London W12 0NN, UK. E-mail: matthew.saunders@ifhad.org

 @ERSpublications

**The global health community must learn from COVID-19 and take action now on tuberculosis and its social determinants, potentially saving millions from a preventable and curable disease** <https://bit.ly/2LLgLgA>

**Cite this article as:** Saunders MJ, Evans CA. COVID-19, tuberculosis and poverty: preventing a perfect storm. *Eur Respir J* 2020; 56: 2001348 [<https://doi.org/10.1183/13993003.01348-2020>].

This single-page version can be shared freely online.

The coronavirus disease 2019 (COVID-19) pandemic is likely to be the defining global health crisis of our generation. As the United Nations Development Programme highlighted in their recent call to action, the impact of this pandemic will extend beyond the immediate medical consequences to have far-reaching and long-lasting social and economic impacts, threatening to disproportionately affect poorer people in poorer countries [1]. Income losses are anticipated to exceed USD 220 billion in developing countries, where many people live day-to-day without access to social protection, and food security is precarious [1]. Strikingly, a recent United Nations study suggested that the social and economic consequences of the COVID-19 pandemic could increase the number of people living in poverty by as much as half a billion, with the majority of these newly poor people living in Africa, South-East Asia, and Central and South America [2].
